# Supplementary material for: Genetic Variants Relate to Fasting Plasma Glucose, 2-Hour Postprandial Glucose, Glycosylated Hemoglobin, and BMI in Prediabetes
Source: PubMed Central journal article supplement (PMC8923657; doi:10.3389/fendo.2022.778069), 2022-03-01
Supplement: Table_1.pdf [file Table_1.pdf]

Table S1 SNP associated with FPG, 2hPG, HbA1c and BMI from the genome-wide association study after imputation analysis for prediabetes

| SNP              | Chr (BP)      | Gene             | Minor/Major allele | MAF   | $\beta$ (SE)   | <i>p</i> Value |
|------------------|---------------|------------------|--------------------|-------|----------------|----------------|
| Dominant model   |               |                  |                    |       |                |                |
| 2hPG associated  |               |                  |                    |       |                |                |
| rs9550371        | 13 (30690780) | USPL1, ALOX5AP   | G/A                | 0.167 | -1.149 (1.637) | 3.88E-06       |
| rs13052524       | 21 (34075614) | MRPS6, SLC5A3    | A/T                | 0.061 | -0.914 (1.635) | 2.09E-06       |
| rs62212118       | 21 (34093207) | MRPS6, SLC5A3    | A/G                | 0.033 | -0.927 (1.637) | 4.03E-06       |
| HbA1c associated |               |                  |                    |       |                |                |
| rs142013708      | 1 (30115880)  | LINC01648, MATN1 | C/A                | 0.030 | -1.341 (1.547) | 3.20E-06       |
| rs140071694      | 1 (30116213)  | LINC01648, MATN1 | C/T                | 0.030 | -1.341 (1.547) | 3.20E-06       |
| rs150306839      | 1 (30116277)  | LINC01648, MATN1 | T/C                | 0.030 | -1.341 (1.547) | 3.20E-06       |
| rs138084074      | 1 (30116278)  | LINC01648, MATN1 | G/A                | 0.030 | -1.341 (1.547) | 3.20E-06       |
| rs142002616      | 1 (30116659)  | LINC01648, MATN1 | G/A                | 0.031 | -1.357 (1.545) | 1.60E-06       |
| rs1371810        | 5 (34503247)  | NONE, RAI14      | T/C                | 0.347 | -1.172 (1.547) | 2.70E-06       |
| rs1371809        | 5 (34503441)  | NONE, RAI14      | G/T                | 0.349 | -1.156 (1.547) | 2.59E-06       |
| rs4146607        | 5 (34503676)  | NONE, RAI14      | C/A                | 0.349 | -1.156 (1.547) | 2.59E-06       |
| rs4146606        | 5 (34503902)  | NONE, RAI14      | C/T                | 0.349 | -1.156 (1.547) | 2.59E-06       |
| rs13157326       | 5 (34504172)  | NONE, RAI14      | A/G                | 0.349 | -1.156 (1.547) | 2.59E-06       |
| rs6880621        | 5 (34504277)  | NONE, RAI14      | G/A                | 0.349 | -1.162 (1.547) | 2.49E-06       |
| rs11745300       | 5 (34504563)  | NONE, RAI14      | G/C                | 0.349 | -1.156 (1.547) | 2.59E-06       |
| BMI associated   |               |                  |                    |       |                |                |
| rs7624734        | 3 (39067012)  | WDR48            | A/G                | 0.340 | -0.184 (1.471) | 2.58E-06       |
| rs11142842       | 9 (71478193)  | TRPM3;TMEM2      | G/A                | 0.306 | -0.121 (1.465) | 5.31E-07       |
| rs1891298        | 9 (71479613)  | TRPM3;TMEM2      | A/G                | 0.310 | -0.124 (1.469) | 2.13E-06       |
| rs1891299        | 9 (71479750)  | TRPM3;TMEM2      | G/T                | 0.310 | -0.125 (1.469) | 1.96E-06       |
| rs11142843       | 9 (71479866)  | TRPM3;TMEM2      | A/T                | 0.310 | -0.125 (1.469) | 1.96E-06       |
| Recessive model  |               |                  |                    |       |                |                |

|                  |               |                     |     |       |                |          |  |
|------------------|---------------|---------------------|-----|-------|----------------|----------|--|
| FPG associated   |               |                     |     |       |                |          |  |
| rs4661250        | 1 (223225986) | SUSD4               | G/A | 0.204 | -1.243 (0.843) | 4.64E-06 |  |
| rs3095307        | 6 (31124272)  | PSORS1C1            | G/C | 0.351 | -1.304 (0.842) | 2.92E-06 |  |
| rs3094203        | 6 (31124764)  | PSORS1C1            | A/G | 0.351 | -1.304 (0.842) | 2.92E-06 |  |
| rs3094202        | 6 (31124770)  | PSORS1C1            | A/G | 0.338 | -1.313 (0.842) | 4.31E-06 |  |
| rs3094201        | 6 (31124986)  | PSORS1C1            | A/G | 0.352 | -1.304 (0.842) | 2.92E-06 |  |
| rs3095302        | 6 (31125289)  | PSORS1C1            | G/A | 0.352 | -1.304 (0.842) | 2.92E-06 |  |
| rs3094200        | 6 (31125355)  | PSORS1C1            | A/G | 0.352 | -1.304 (0.842) | 2.92E-06 |  |
| rs3094198        | 6 (31125550)  | PSORS1C1            | A/G | 0.352 | -1.304 (0.842) | 2.92E-06 |  |
| rs3095301        | 6 (31125579)  | PSORS1C1            | T/C | 0.338 | -1.313 (0.842) | 4.31E-06 |  |
| rs3131003        | 6 (31125705)  | PSORS1C1            | G/A | 0.336 | -1.313 (0.842) | 4.31E-06 |  |
| 2hPG associated  |               |                     |     |       |                |          |  |
| rs201438706      | 4 (77421653)  | CCNG2, CXCL13       | T/A | 0.301 | -0.906 (1.635) | 2.66E-06 |  |
| rs12649862       | 4 (77422666)  | CCNG2, CXCL13       | A/G | 0.301 | -0.906 (1.635) | 2.66E-06 |  |
| rs41476645       | 4 (77423231)  | CCNG2, CXCL13       | T/G | 0.301 | -0.906 (1.635) | 2.66E-06 |  |
| rs12647991       | 4 (77423575)  | CCNG2, CXCL13       | C/A | 0.301 | -0.906 (1.635) | 2.66E-06 |  |
| rs12644845       | 4 (77423590)  | CCNG2, CXCL13       | T/C | 0.301 | -0.906 (1.635) | 2.66E-06 |  |
| rs12648073       | 4 (77423855)  | CCNG2, CXCL13       | G/A | 0.301 | -0.906 (1.635) | 2.66E-06 |  |
| rs12644936       | 4 (77423966)  | CCNG2, CXCL13       | T/C | 0.301 | -0.906 (1.635) | 2.66E-06 |  |
| rs12504012       | 4 (77424479)  | CCNG2, CXCL13       | G/A | 0.300 | -0.906 (1.635) | 2.66E-06 |  |
| rs34938732       | 4 (77424709)  | CCNG2, CXCL13       | A/G | 0.302 | -0.895 (1.634) | 1.61E-06 |  |
| rs13119926       | 4 (77425298)  | CCNG2, CXCL13       | A/G | 0.302 | -0.895 (1.634) | 1.61E-06 |  |
| HbA1c associated |               |                     |     |       |                |          |  |
| rs946911         | 14 (38039549) | LINC00517, SSTR1    | C/T | 0.200 | -1.466 (1.544) | 1.26E-06 |  |
| rs2415427        | 14 (38040029) | LINC00517, SSTR1    | G/A | 0.200 | -1.466 (1.544) | 1.26E-06 |  |
| BMI associated   |               |                     |     |       |                |          |  |
| rs62006357       | 15 (80252110) | LINC01314           | G/A | 0.453 | 0.074 (1.471)  | 4.36E-06 |  |
| rs62008861       | 15 (80253711) | LINC01314;LINC00927 | G/A | 0.451 | 0.085 (1.47)   | 3.39E-06 |  |

FPG: fasting plasma glucose, HbA1c: glycosylated hemoglobin, 2hPG: 2-hour postprandial glucose, BMI: body mass index.  
 $p < 5 \times 10^{-6}$
